# Supplementary material for: Evaluation of a population-wide, systematic screening initiative for tuberculosis on Daru island, Western Province, Papua New Guinea
Source: Springer Nature journal article supplement (doi:10.1186/s12889-024-17918-y), 2024-04-04
Supplement: MOESM1 [file 26945092]

## Supplementary Material

**Supplementary Table. Univariate and multivariate analyses of clinical, demographic, behavioural and socioeconomic risk factors for TB excluding participants with a past history of TB**

| Characteristics                                             |                                  | Total         | Confirmed TB Case (%) | Univariate         | Multivariate         |
|-------------------------------------------------------------|----------------------------------|---------------|-----------------------|--------------------|----------------------|
|                                                             |                                  |               |                       | Crude OR (95% CI)  | Adjusted OR (95% CI) |
| Sex                                                         | Male                             | 3 339 (50.8%) | 28 (0.8%)             | 1.81 (0.96-3.39)   |                      |
|                                                             | Female                           | 3 209 (48.8%) | 15 (0.5%)             | 1.00 (Ref)         |                      |
|                                                             | Unknown                          | 23 (0.4%)     | 0 (0%)                |                    |                      |
| Age Group                                                   | 5-14 yrs                         | 920 (14%)     | 2 (0.2%)              | 1.00 (Ref)         | 1.00 (Ref)           |
|                                                             | 15-29 yrs                        | 2 716 (41.2%) | 14 (0.5%)             | 2.38 (0.54-10.48)  | 2.61 (0.56-12.16)    |
|                                                             | 30-44 yrs                        | 1 486 (22.6%) | 12 (0.8%)             | 3.74 (0.83-16.73)  | 3.27 (0.68-15.62)    |
|                                                             | 45-59 yrs                        | 1 088 (16.5%) | 14 (1.3%)             | 5.98 (1.36-26.39)* | 6.15 (1.33-28.37)*   |
|                                                             | ≥60                              | 376 (5.7%)    | 1 (0.3%)              | 1.22 (0.11-13.54)  | 0.91 (0.08-10.33)    |
| BMI                                                         | Severely Underweight             | 197 (3%)      | 5 (2.5%)              | 4.16 (1.59-10.89)* | 4.52 (1.66-12.32)*   |
|                                                             | Underweight                      | 683 (10.4%)   | 10 (1.5%)             | 2.37 (1.15-4.91)*  | 2.13 (1.02-4.48)*    |
|                                                             | Normal weight                    | 4 500 (68.3%) | 28 (0.6%)             | 1.00 (Ref)         | 1.00 (Ref)           |
|                                                             | Overweight                       | 1 206 (18.3%) | 0 (0%)                |                    |                      |
| Ward                                                        | Karakara                         | 3 057 (46.4%) | 10 (0.3%)             | 1.00 (Ref)         | 1.00 (Ref)           |
|                                                             | Tamati                           | 899 (13.7%)   | 5 (0.6%)              | 1.70 (0.58-5.00)   | 1.35 (0.45-4.07)     |
|                                                             | Darowaro                         | 1 252 (19%)   | 10 (0.8%)             | 2.45 (1.02-5.91)*  | 1.74 (0.70-4.32)     |
|                                                             | Iaru                             | 1 378 (20.9%) | 18 (1.3%)             | 4.03 (1.87-8.76)*  | 3.10 (1.39-6.92)*    |
| Household Size                                              | <5 people                        | 507 (7.7%)    | 10 (2%)               | 4.19 (1.91-9.20)*  | 4.07 (1.81-9.21)*    |
|                                                             | 5-9 people                       | 2 522 (38.3%) | 16 (0.6%)             | 1.33 (0.67-2.64)   | 1.24 (0.61-2.47)     |
|                                                             | ≥10 people                       | 3 557 (54%)   | 17 (0.5%)             | 1.00 (Ref)         | 1.00 (Ref)           |
| Housing Type                                                | Individual house                 | 4 782 (72.6%) | 32 (0.7%)             | 1.00 (Ref)         |                      |
|                                                             | Settlement, Prison & Unknown     | 1 804 (27.4%) | 11 (0.6%)             | 0.91 (0.46-1.81)   |                      |
| Education                                                   | None                             | 227 (3.4%)    | 3 (1.3%)              | 2.28 (0.66-7.87)   |                      |
|                                                             | Elementary                       | 3 625 (55%)   | 24 (0.7%)             | 1.13 (0.60-2.14)   |                      |
|                                                             | Secondary and higher, or unknown | 2 734 (41.5%) | 16 (0.6%)             | 1.00 (Ref)         |                      |
| Job                                                         | None                             | 3 129 (47.5%) | 20 (0.6%)             | 1.00 (Ref)         |                      |
|                                                             | Formal employment                | 2 802 (42.5%) | 19 (0.7%)             | 1.06 (0.56-1.99)   |                      |
|                                                             | Informal employment & Unknown    | 655 (9.9%)    | 4 (0.6%)              | 0.96 (0.33-2.80)   |                      |
| Income (kina/month)                                         | <200                             | 3 235 (49.1%) | 27 (0.8%)             | 2.35 (1.06-5.18)*  |                      |
|                                                             | 200-499                          | 870 (13.2%)   | 6 (0.7%)              | 1.94 (0.67-5.60)   |                      |
|                                                             | ≥500                             | 2 240 (34%)   | 8 (0.4%)              | 1.00 (Ref)         |                      |
|                                                             | Unknown                          | 241 (3.7%)    | 2 (0.8%)              | 2.33 (0.49-11.06)  |                      |
| Presence of behavioral and social risk factors and symptoms | Smoking                          | 2 319 (35.2%) | 23 (1.0%)             | 2.12 (1.16-3.87)*  | 1.42 (0.75-2.69)     |
|                                                             | Alcohol                          | 2 022 (30.7%) | 16 (0.8%)             | 1.32 (0.71-2.46)   |                      |
|                                                             | Buai                             | 3 594 (54.6%) | 25 (0.7%)             | 1.13 (0.61-2.08)   |                      |
|                                                             | Cough                            | 163 (2.5%)    | 5 (3.1%)              | 5.14 (2.00-13.23)* | 2.14 (0.88-5.25)†    |
|                                                             | Fever                            | 99 (1.5%)     | 5 (5.1%)              | 8.55 (3.30-22.18)* |                      |
|                                                             | Night Sweats                     | 106 (1.6%)    | 3 (2.8%)              | 4.55 (1.38-14.92)* |                      |

|              |                   |               |            |                           |  |
|--------------|-------------------|---------------|------------|---------------------------|--|
|              | Loss of Appetite  | 96 (1.5%)     | 2 (2.1%)   | 3.27 (0.78-13.71)         |  |
|              | Household contact | 597 (9.1%)    | 5 (0.8%)   | 1.31 (0.51-3.33)          |  |
|              | Social contact    | 579 (8.8%)    | 4 (0.7%)   | 1.05 (0.37-2.94)          |  |
| CAD4TB Score | <50               | 6 273 (95.2%) | 7 (0.1%)   | 1.00 (Ref)                |  |
|              | 50-59             | 144 (2.2%)    | 8 (5.6%)   | 52.66 (18.83-147.27)*     |  |
|              | 60-69             | 94 (1.4%)     | 13 (13.8%) | 143.66 (55.86-369.48)*    |  |
|              | 70-79             | 38 (0.6%)     | 6 (15.8%)  | 167.84 (53.44-27.12)*     |  |
|              | 80-89             | 14 (0.2%)     | 6 (42.9%)  | 671.36 (184.40-2,444.30)* |  |
|              | 90-100            | 23 (0.3%)     | 3 (13.0%)  | 134.27 (32.39-556.58)*    |  |

CI: Confidence interval, OR: Odds Ratio

\* Significant difference ( $p < 0.05$ )

† Multivariate adjusted OR was calculated using the single yes/no binary variable for any symptom (cough, fever, loss of appetite, and/or night sweats)
